# Supplementary material for: WASH is required for lysosomal recycling and efficient autophagic and phagocytic digestion
Source: PubMed Central journal article supplement — Mol Biol Cell. 2013 Sep 1;24(17):2714–26. doi: 10.1091/mbc.E13-02-0092 (PMC3756923; doi:10.1091/mbc.e13-02-0092), 2013-09-01

# Supplemental Materials

*Molecular Biology of the Cell*

King et al.

**Supplementary Figure 1.** (A) Normal phagocytosis of beads in *WASH* complex mutants. (B) Calibration curve of lysosensor blue/green fluorescence at different pH's. The ratio of emission at 450nm/510nm at each pH is plotted. A best fit curve was then fitted using the least squares method, and the equation, and  $R^2$  value are indicated on the graph.

**Supplementary table 1.** Full list of proteins reduced by at least 30% in both *WASH* and *FAM21* mutants. Proteins are grouped by subcellular compartment. \* $P < 0.05$ , \*\* $P < 0.005$ , \*\*\* $P < 0.001$  (T-test).

# King et al. Supplementary Figure 1

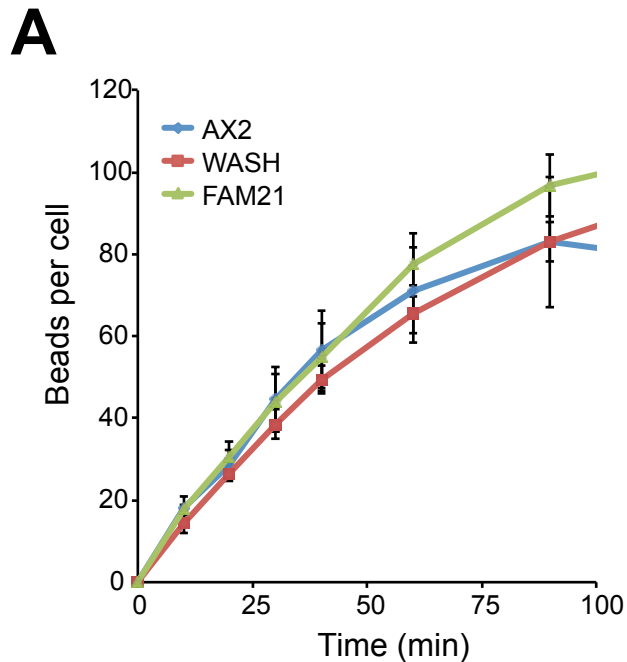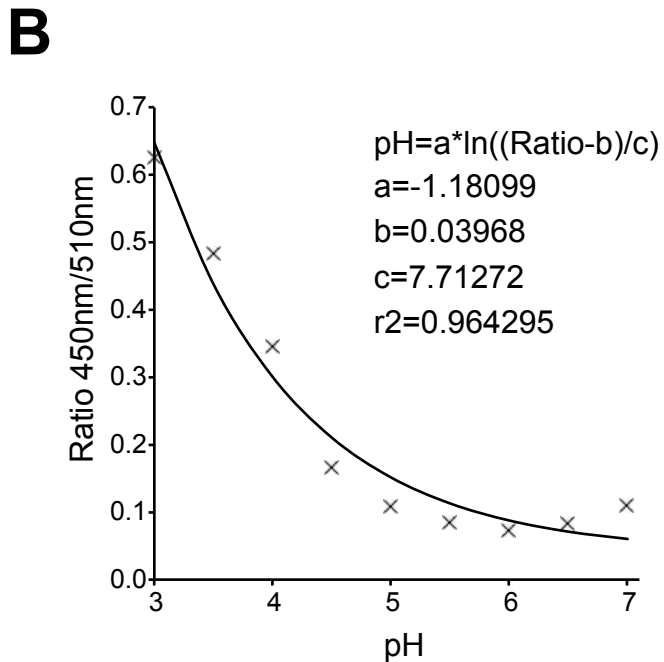

Supplement: supp_E13-02-0092v1_CombinedSupMats.pdf [file supp_E13-02-0092v1_CombinedSupMats.pdf]
